# Supplementary material
Source: PubMed Central journal article supplement (PMC5865014)
Supplement: IAI.00504-17_zii999092336s1.pdf [file IAI.00504-17_zii999092336s1.pdf]

## Supplemental Figure

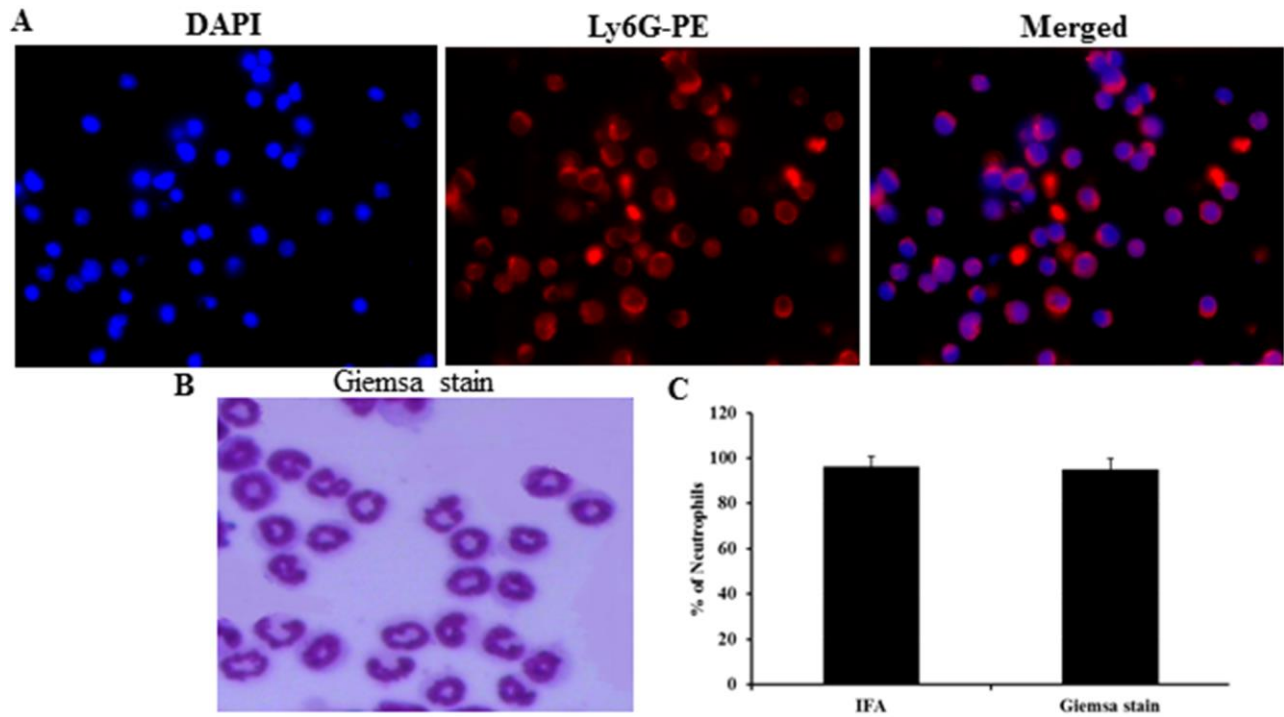

**Fig. S1.** Analysis of the purity of isolated BMNs by IFA with neutrophil marker Ly-6G and Geimsa staining. **A:** Ly-6G stained neutrophils along with nuclei suggesting 96% cells are neutrophils. **B:** Geimsa stained neutrophils showing purple donut shaped nuclei. **C:** Percentage of Ly-6G or Geimsa stained cells. A total of 200 cells were counted per coverslip on three separate slips. Results are expressed as percent stained cells.
